# Supplementary material for: Self-supporting composited electrocatalysts of ultrafine Mo2C on 3D-hierarchical porous carbon monoliths for efficient hydrogen evolution
Source: Royal Society of Chemistry journal article supplement (doi:10.1039/d0ta06438f), 2020-01-01
Supplement: d0ta06438f1.pdf [file d0ta06438f1.pdf]

## Supplementary information

### Self-Supporting Compositated Electrocatalysts of Ultrafine Mo<sub>2</sub>C on 3D-Hierarchical Porous Carbon Monoliths for Efficient Hydrogen Evolution

Haiyang Lu<sup>a</sup>, Boxu Gao<sup>a</sup>, Hongbin Zhang<sup>b\*</sup>, Xueliang Fan<sup>a</sup>, Luyao Zheng<sup>a</sup>, Jingwen Tan<sup>c</sup>, Sinong Wang<sup>b</sup>, Yahong Zhang<sup>a</sup>, Qingsheng Gao<sup>c\*</sup>, Yi Tang<sup>a\*</sup>

a. Department of Chemistry, Shanghai Key Laboratory of Molecular Catalysis and Innovative Materials, Laboratory of Advanced Materials and Collaborative Innovation Center of Chemistry for Energy Materials, Fudan University, Shanghai 200433, China. E-mail: [yitang@fudan.edu.cn](mailto:yitang@fudan.edu.cn)

b. Institute for Preservation of Chinese Ancient Books, Fudan University Library, Fudan University, Shanghai 200433, China. E-mail: [zhanghongbin@fudan.edu.cn](mailto:zhanghongbin@fudan.edu.cn)

c. Department of Chemistry, Jinan University, Guangzhou 510632, China. E-mail: [tqsgao@jnu.edu.cn](mailto:tqsgao@jnu.edu.cn)

#### Calculation of Mo<sub>2</sub>C content

A combustion reaction during the heating process can eliminate all the carbon elements and transform Mo<sub>2</sub>C into MoO<sub>3</sub>.<sup>1</sup> Thus, the content of Mo elements and Mo<sub>2</sub>C can be further calculated through MoO<sub>3</sub> content according to the following equation:

$$m_{\text{Mo}_2\text{C}} \% = \frac{m_{\text{residual}} \% \times M(\text{Mo}_2\text{C})}{2 \times M(\text{MoO}_3)}$$

Take 3D Mo<sub>2</sub>C/PCM-4 for example,  $m_{\text{Mo}_2\text{C}} \% = \frac{49\% \times 204}{2 \times 144} = 34.7\%$ . The atomic percentage of

Mo is calculated to be 5.7 at.%.

#### Calculation of the surface fraction of Mo<sub>2</sub>C

From the integrated area of the anodic wave as shown in Fig. 5e, we derive a charge of  $Q = 15.896$  C passed during the irreversible oxidation of Mo<sub>2</sub>C to MoO<sub>3</sub> following a 16-electron process:<sup>1-3</sup>

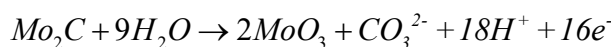

$$n_{\text{surface}} = \frac{Q}{nF} = \frac{15.896 \text{ C}}{16 \times 96500} = 1.03 \times 10^{-5} \text{ mol}$$

$$n_{\text{total}} = \frac{mw}{M_w} = \frac{0.00928 \text{ g} \times 34.7\%}{203.88 \text{ g/mol}} = 1.58 \times 10^{-5} \text{ mol}$$

$$f = \frac{n_{\text{surface}}}{n_{\text{total}}} = \frac{1.03 \times 10^{-5}}{1.58 \times 10^{-5}} = 65.2\%$$

Where  $n = 16$  is the number of electron transferred,  $F$  is the Faraday constant,  $m$  is the mass of the self-supporting 3D Mo<sub>2</sub>C/PCM-4 electrode,  $w$  is the weight fraction of Mo<sub>2</sub>C obtained from TGA,  $M_w$  is the molecular weight of Mo<sub>2</sub>C, and  $f$  is the exposed surface fraction of Mo<sub>2</sub>C in 3D Mo<sub>2</sub>C/PCM-4.

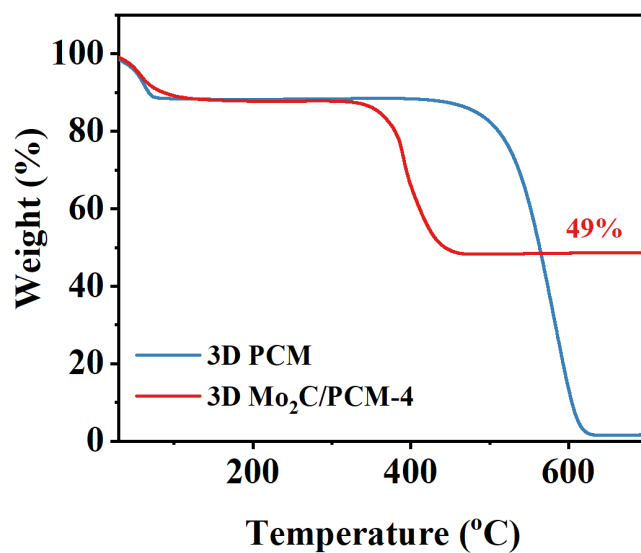

**Fig. S1** TGA plots of 3D PCM and 3D Mo<sub>2</sub>C/PCM-4 under the air atmosphere.

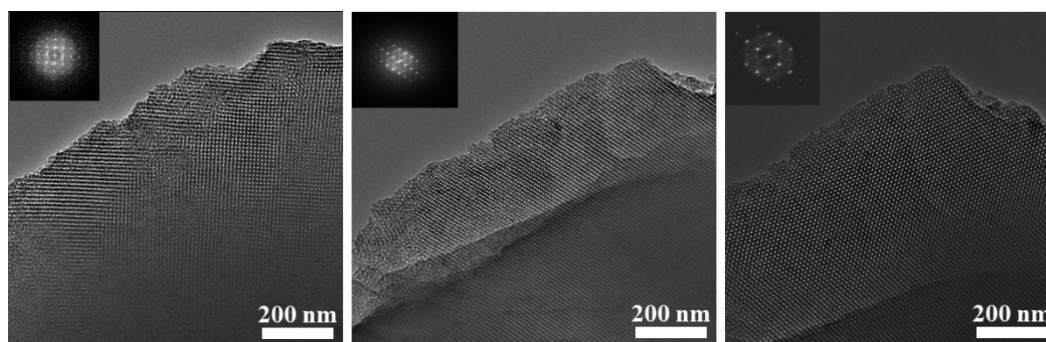

**Fig. S2** TEM images of 3D PCM, viewed from [100], [110], and [111] directions and its corresponding fast Fourier transform (FFT) diffractograms.

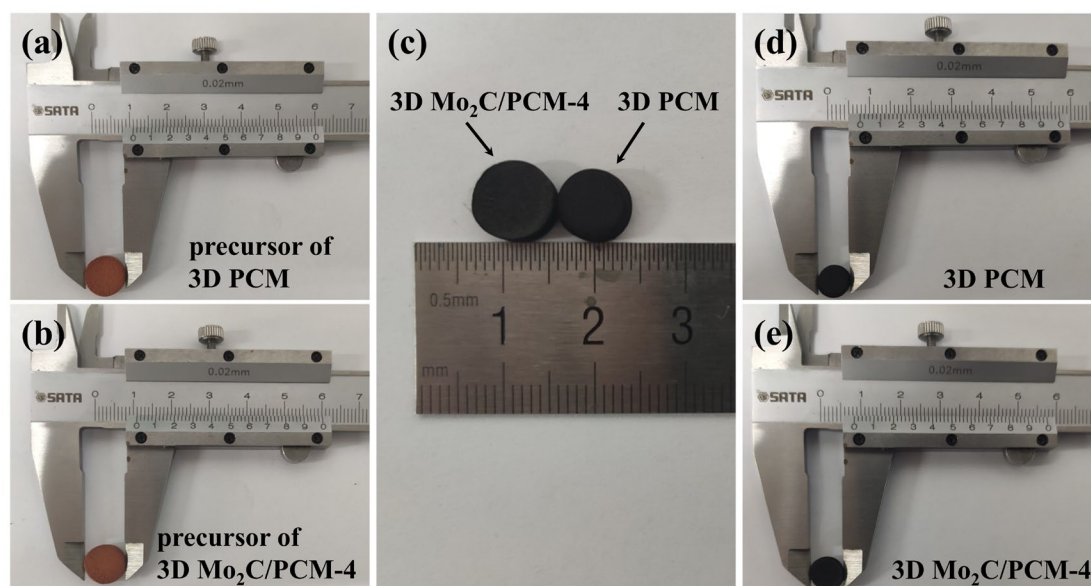

**Fig. S3** Optical photos of materials: (a) precursor of 3D PCM, (b) precursor of 3D Mo<sub>2</sub>C/PCM-4, (c) comparison of 3D PCM and 3D Mo<sub>2</sub>C/PCM-4, (d) 3D PCM, and (e) 3D Mo<sub>2</sub>C/PCM-4.

As shown in Fig. S3a-b, the diameter of the two disc-shaped precursors are 11.00 mm. And after annealing treatment at 800 °C, the volume of the two shrinks to different degrees evidently (Fig. S3c). Specifically, the diameter of 3D PCM is 7.86 mm (Fig. S3d), while the diameter of 3D Mo<sub>2</sub>C/PCM-4 is 8.44 mm (Fig. S3e). Thus, we believe that the rigid inorganic Mo species hindering the shrinkage of the precursor during the annealing treatment, resulting in a little peak shift in SAXS between 3D PCM and 3D Mo<sub>2</sub>C/PCM-4.

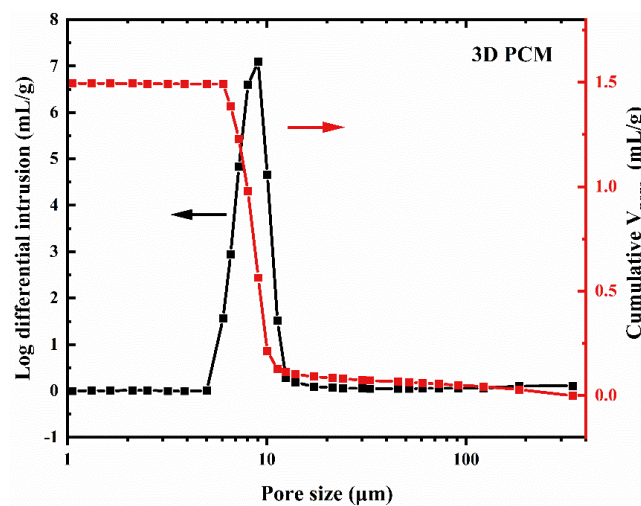

**Fig. S4** Hg intrusion curve and differential PSD of 3D PCM.

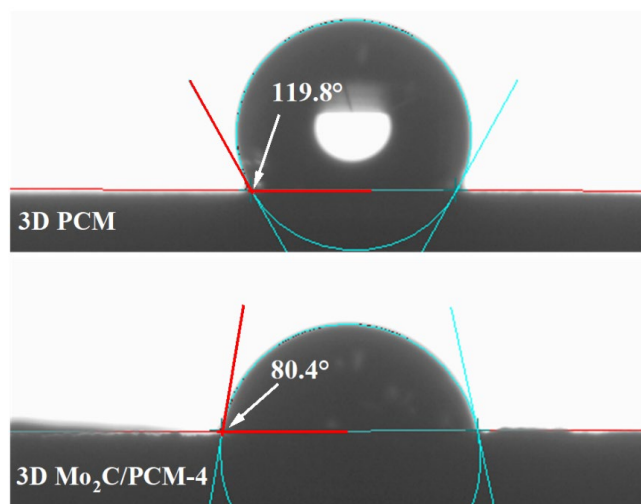

**Fig. S5** Water contact angle measurements of 3D PCM powder and 3D Mo<sub>2</sub>C/PCM-4 powder.

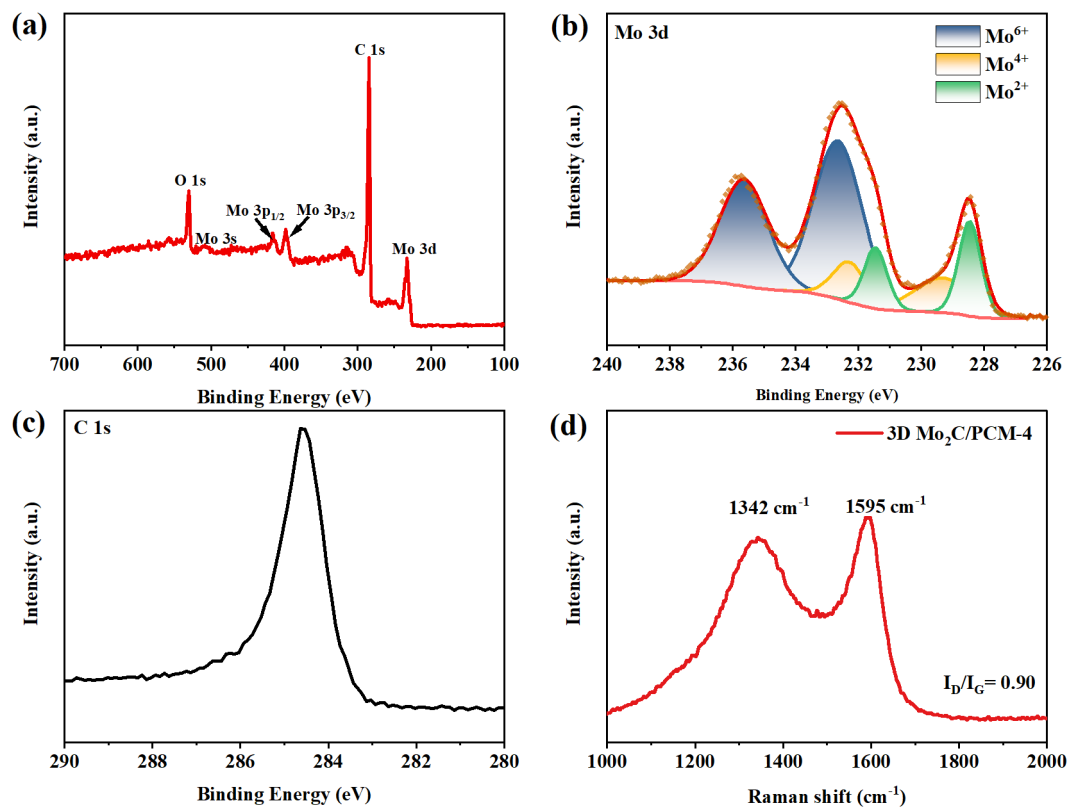

**Fig. S6** (a) XPS Survey spectrum of 3D Mo<sub>2</sub>C/PCM-4. (b) Fine spectrum of Mo 3d, and (c) high-resolution spectrum of C 1s. (d) Raman spectrum of 3D Mo<sub>2</sub>C/PCM-4.

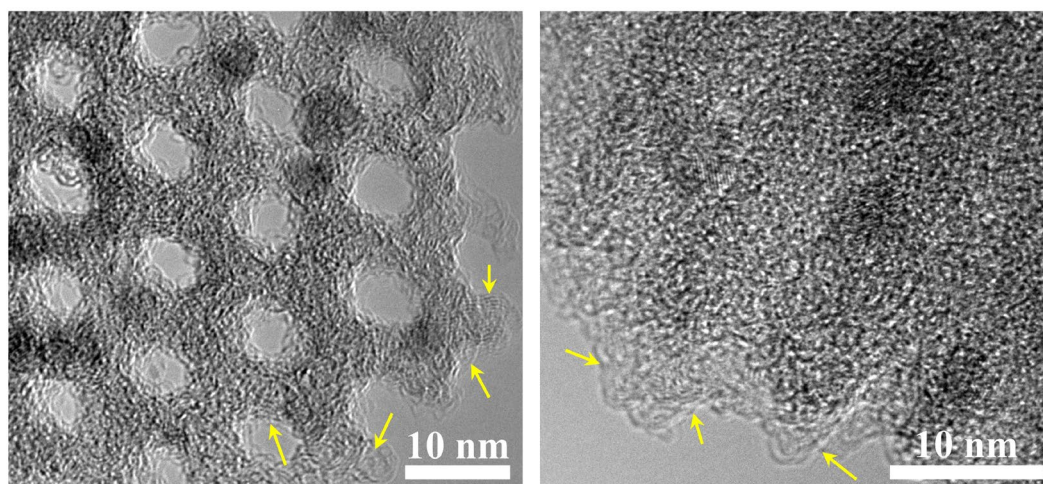

**Fig. S7** TEM images of 3D Mo<sub>2</sub>C/PCM-4.

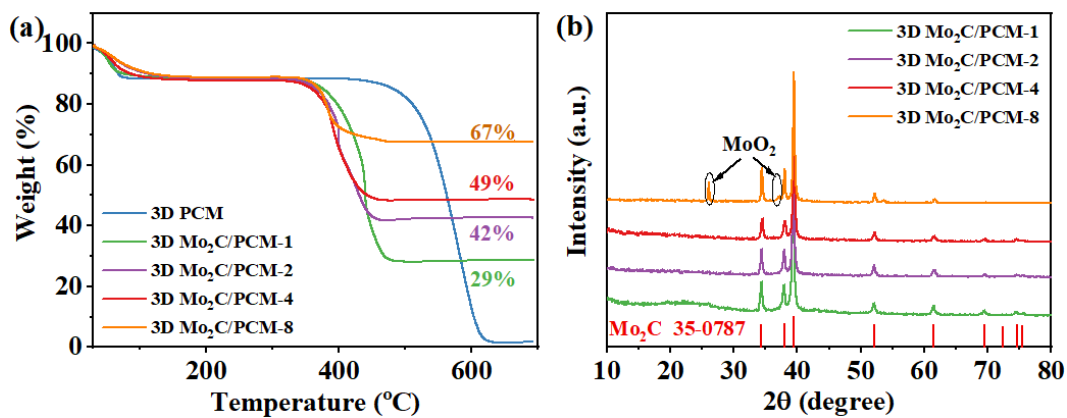

**Fig. S8** (a) TGA plots of 3D PCM and 3D Mo<sub>2</sub>C/PCMs under the air atmosphere. (b) XRD patterns of 3D Mo<sub>2</sub>C/PCMs.

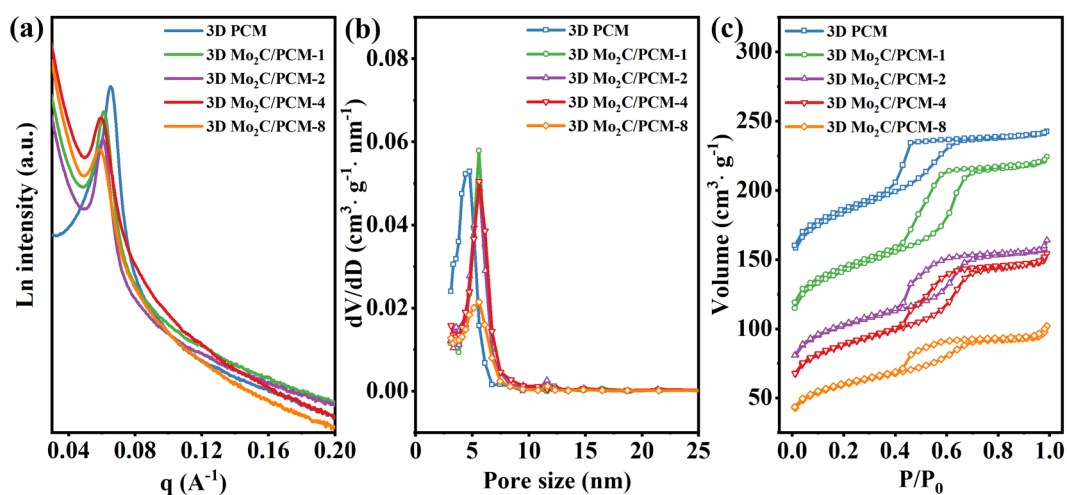

**Fig. S9** (a) SAXS patterns, (b) pore size distribution curves, and (c) N<sub>2</sub> sorption isotherms of 3D PCM and 3D Mo<sub>2</sub>C/PCMs.

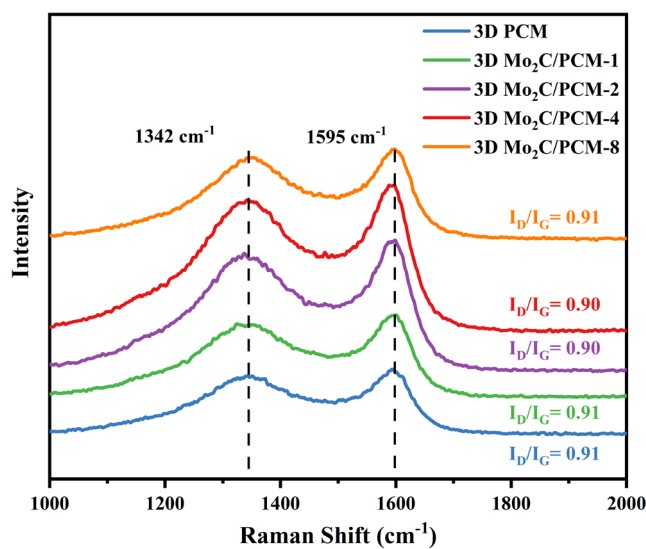

**Fig. S10** Raman spectra of 3D PCM and 3D Mo<sub>2</sub>C/PCMs.

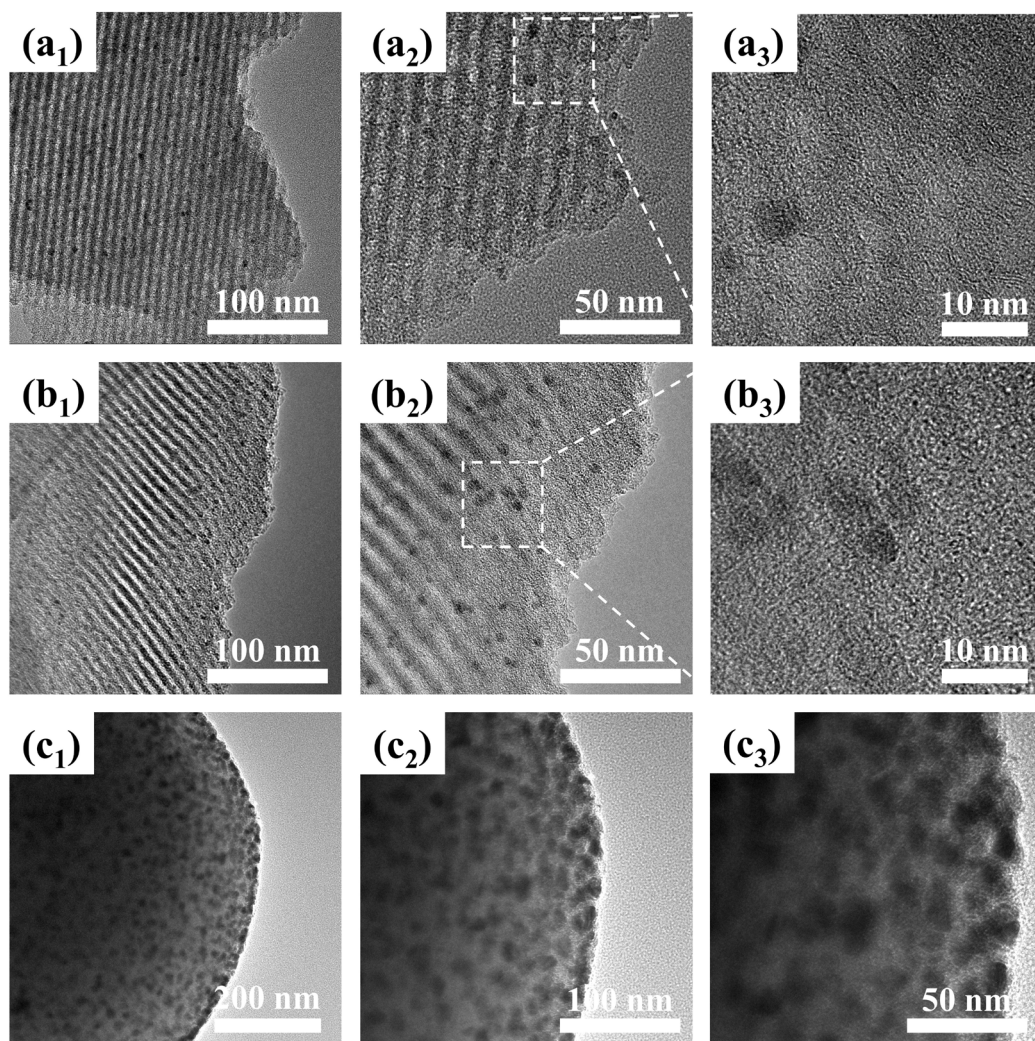

**Fig. S11** (a<sub>1</sub> - a<sub>3</sub>) TEM images of 3D Mo<sub>2</sub>C/PCM-1, (b<sub>1</sub> - b<sub>3</sub>) TEM images of 3D Mo<sub>2</sub>C/PCM-2, and (c<sub>1</sub> - c<sub>3</sub>) TEM images of 3D Mo<sub>2</sub>C/PCM-8.

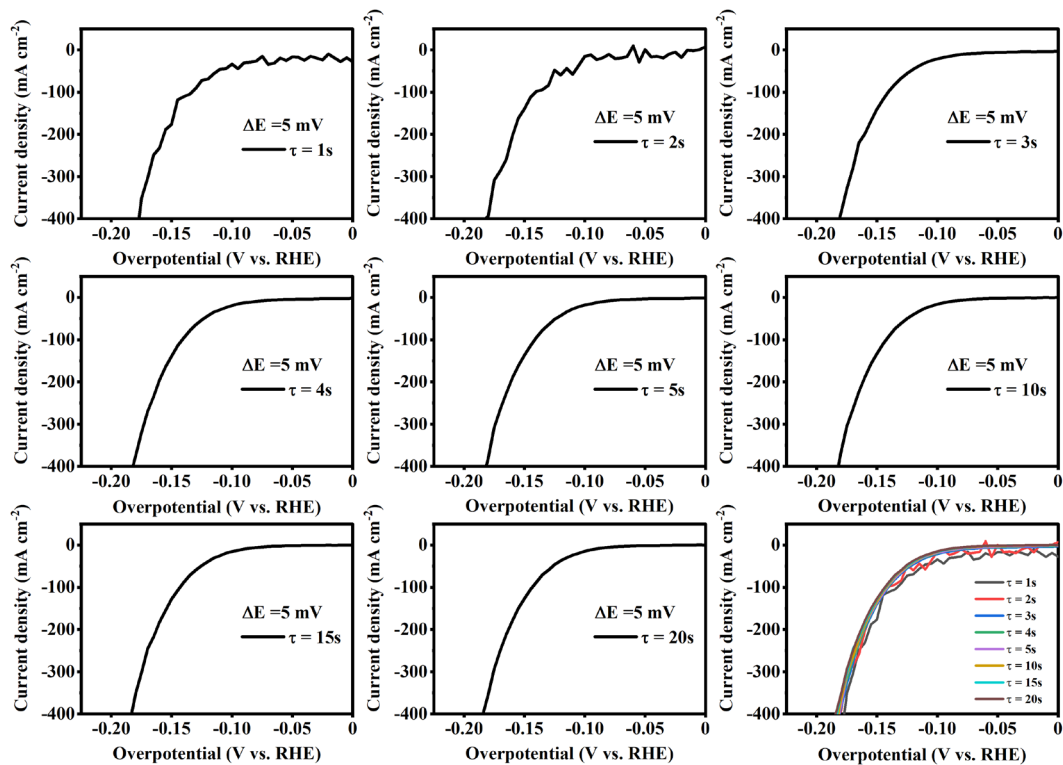

**Fig. S12** Polarization curves of 3D Mo<sub>2</sub>C/PCM-4 recorded by staircase voltammetry (SCV) at a step height ( $\Delta E$ ) of 5 mV with different step period ( $\tau$ ) in 0.5 M H<sub>2</sub>SO<sub>4</sub>.

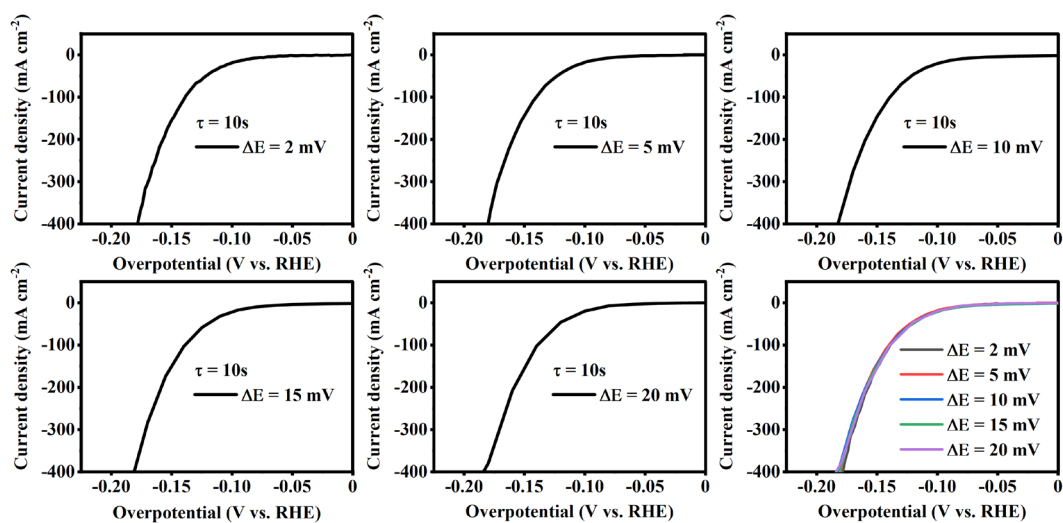

**Fig. S13** Polarization curves of 3D Mo<sub>2</sub>C/PCM-4 recorded by staircase voltammetry (SCV) at a step period ( $\tau$ ) of 10s with different step height ( $\Delta E$ ) in 0.5 M H<sub>2</sub>SO<sub>4</sub>.

**Explanation of Fig. S12 and Fig. S13.** Multiple SCV curves under different  $\Delta E$  and different step periods to check the parameters of SCV method. Here, taking 3D Mo<sub>2</sub>C/PCM-4 as the model sample, the curves were measured by SCV at a step height ( $\Delta E$ ) of 5 mV with different step period ( $\tau$ ), as shown in Fig. S12. When the step periods ( $\tau$ ) is too short ( $\tau = 1, 2$  s), the charging current caused by electrical double layers cannot be effectively eliminated, thus the polarization curves are not smooth and stable. When the  $\tau$  exceeds 4 s, the curves can be well stabilized, and there is no obvious

difference of curves among different  $\tau$ . What's more, Fig. S13 displays the curves of at a fixed  $\tau$  of 10 s with different  $\Delta E$ . It is clear that in the  $\Delta E$  range of 2 to 20 mV, a step period of 10 s is sufficient to stabilize the polarization curve. In summary, the experimental parameters we adopted in SCV method (a  $\Delta E$  of 5 mV and a step period of 10 s) is reasonable and can help us to obtain genuine HER activity.

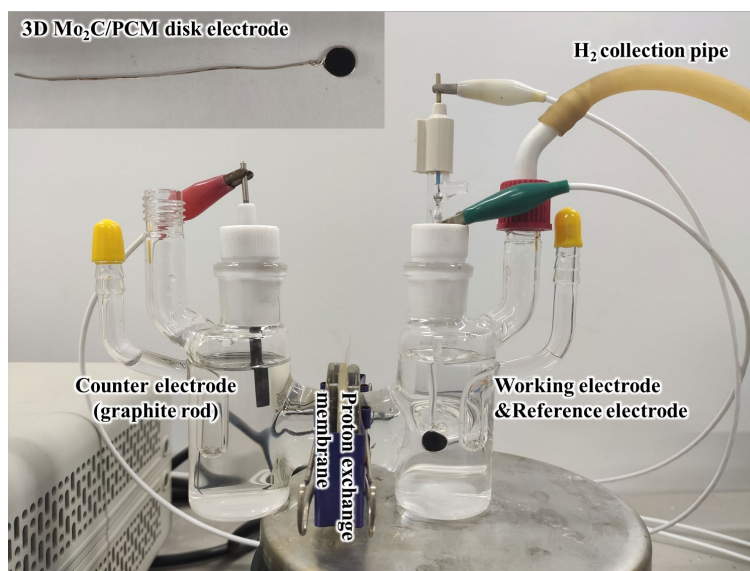

**Fig. S14** Optical photo of reaction device with proton exchange membrane (inset: the as-made 3D Mo<sub>2</sub>C/PCM disk electrode).

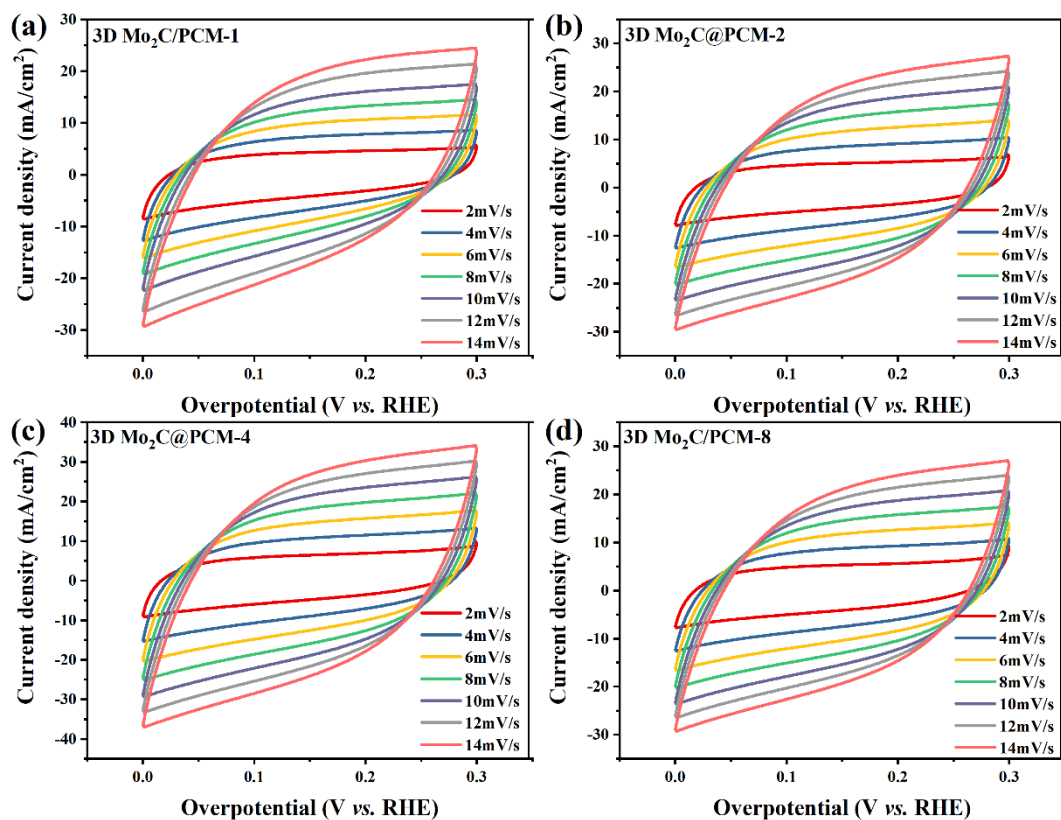

**Fig. S15** CV curves of 3D Mo<sub>2</sub>C/PCMs at different scan rates (2, 4, 6, 8, 10, 12, and 14 mV/s).



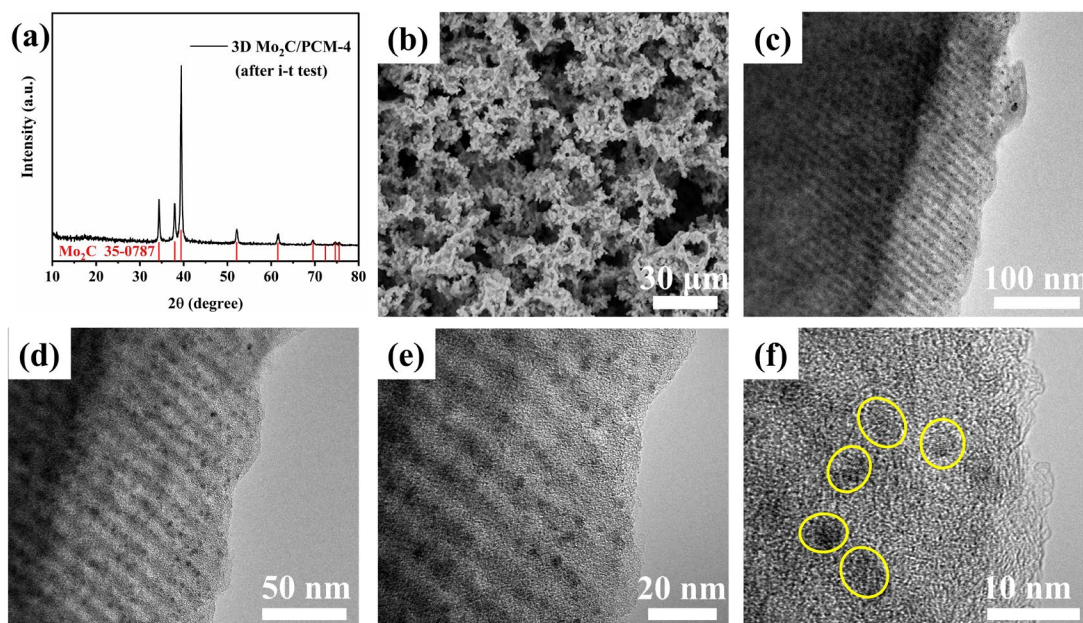

**Fig. S16** (a) XRD pattern, (b) SEM image, and (c - f) TEM images of 3D Mo<sub>2</sub>C/PCM-4 after the stability test.

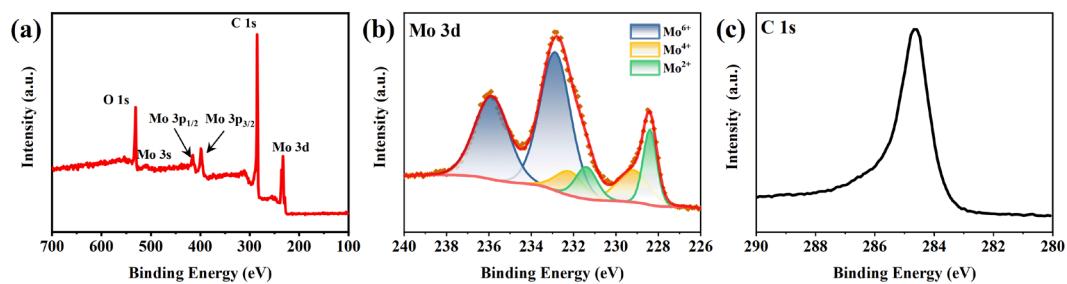

**Fig. S17** The XPS spectra of 3D Mo<sub>2</sub>C/PCM-4 after long-time stability test: (a) XPS survey, (b) fine spectrum of Mo 3d and (c) high-resolution spectrum of C 1s.

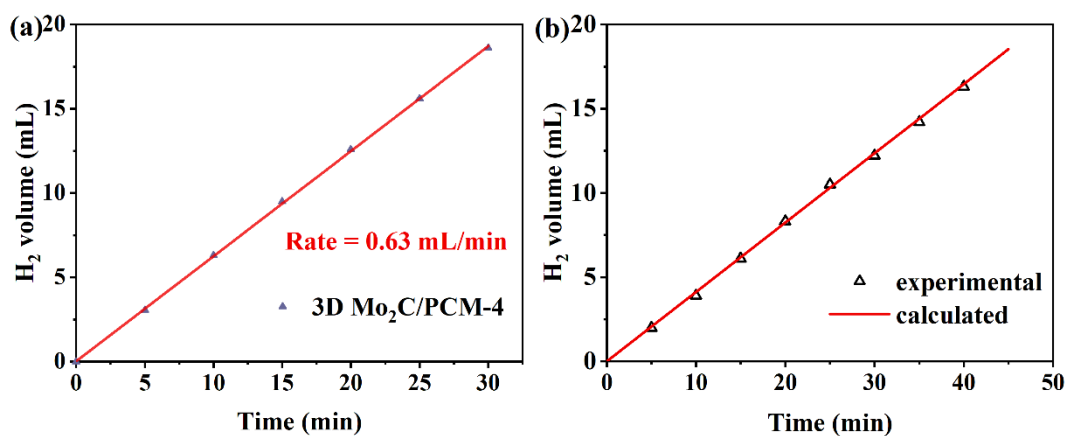

**Fig. S18** (a) The plot of measured H<sub>2</sub> volume versus time for 3D Mo<sub>2</sub>C/PCM-4 at 300 mV. (b) Faradaic efficiency test of 3D Mo<sub>2</sub>C/PCM-4 by plotting experimental H<sub>2</sub> volume and theoretical H<sub>2</sub> volume against time at the current of 60 mA.

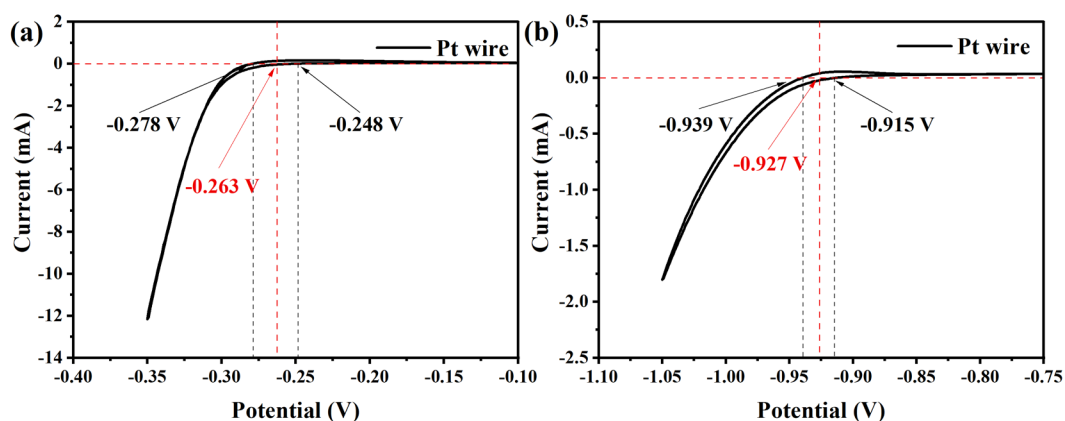

**Fig. S19** Calibration of (a) a saturated calomel electrode (SCE) and (b) a mercury oxide electrode (Hg/HgO) potential using a reversible hydrogen electrode (RHE) by CV curve at scan rate of 2 mV/s in 0.5 M H<sub>2</sub>SO<sub>4</sub> and 1.0 M KOH, respectively.

The potential of reference electrode was calibrated with respect to a reversible hydrogen electrode (RHE), which was performed in a high-purity H<sub>2</sub> (99.999%) saturated electrolyte with a Pt wire as the working electrode and counter electrode. And then cyclic voltammograms (CVs) were collected at a scan rate of 2 mV s<sup>-1</sup>, and the average of the two potentials at which the current crossed zero was taken as the thermodynamic potential for the hydrogen electrode reactions. As shown in Fig. S19, in 0.5 M H<sub>2</sub>SO<sub>4</sub>, E(RHE) = E(SCE) + 0.263, and in 1.0 M KOH, E(RHE) = E(Hg/HgO) – 0.927, which were consistent with the result calculated by Nernst equation.

**Table S1** Textual parameters of 3D PCM and 3D Mo<sub>2</sub>C/PCMs

| Catalysts                  | S <sub>BET</sub><br>(m <sup>2</sup> /g) | D <sub>meso</sub><br>(nm) | V <sub>total</sub><br>(cm <sup>3</sup> /g) | V <sub>mic</sub><br>(cm <sup>3</sup> /g) | Mo <sub>2</sub> C content<br>(wt. %) |
|----------------------------|-----------------------------------------|---------------------------|--------------------------------------------|------------------------------------------|--------------------------------------|
| 3D PCM                     | 695                                     | 4.8                       | 0.375                                      | 0.175                                    | 0                                    |
| 3D Mo <sub>2</sub> C/PCM-1 | 532                                     | 5.6                       | 0.347                                      | 0.146                                    | 20.5                                 |
| 3D Mo <sub>2</sub> C/PCM-2 | 378                                     | 5.6                       | 0.254                                      | 0.106                                    | 29.7                                 |
| 3D Mo <sub>2</sub> C/PCM-4 | 321                                     | 5.6                       | 0.234                                      | 0.089                                    | 34.7                                 |
| 3D Mo <sub>2</sub> C/PCM-8 | 215                                     | 5.6                       | 0.158                                      | 0.051                                    | 47.5                                 |

**Table S2** Summary of the HER activity of 3D Mo<sub>2</sub>C/PCMs in 0.5 M H<sub>2</sub>SO<sub>4</sub>.

| Catalysts                  | η <sub>10</sub><br>(mV) | η <sub>100</sub><br>(mV) | Tafel slope<br>(mV/decade) | j <sub>0</sub><br>(mA/cm <sup>2</sup> ) | C <sub>dl</sub><br>(mF/cm <sup>2</sup> ) | R <sub>ct</sub><br>(Ω) |
|----------------------------|-------------------------|--------------------------|----------------------------|-----------------------------------------|------------------------------------------|------------------------|
| 3D Mo <sub>2</sub> C/PCM-1 | 124                     | 214                      | 102                        | 0.34                                    | 1177                                     | 14.8                   |
| 3D Mo <sub>2</sub> C/PCM-2 | 100                     | 193                      | 90                         | 0.40                                    | 1285                                     | 6.2                    |
| 3D Mo <sub>2</sub> C/PCM-4 | 81                      | 146                      | 63                         | 0.51                                    | 1649                                     | 1.7                    |
| 3D Mo <sub>2</sub> C/PCM-8 | 93                      | 163                      | 72                         | 0.37                                    | 1302                                     | 2.6                    |

**Table S3.** Comparison of HER performance for 3D Mo<sub>2</sub>C/PCM with other electrocatalysts in acidic electrolytes.

| Catalysts                                | Electrolytes                         | $j$<br>(mA/cm <sup>2</sup> ) | $\eta$<br>(mV) | Tafel slope<br>(mV/dec) | Ref.      |
|------------------------------------------|--------------------------------------|------------------------------|----------------|-------------------------|-----------|
| 3D Mo <sub>2</sub> C/PCM                 | 0.5 M H <sub>2</sub> SO <sub>4</sub> | 10                           | 81             | 63                      | This work |
| Mo <sub>2</sub> C/CC                     | 0.5 M H <sub>2</sub> SO <sub>4</sub> | 10                           | 140            | 124                     | 4         |
| Mo <sub>2</sub> C-MoO <sub>x</sub> /CC   | 1.0 M HClO <sub>4</sub>              | 10                           | 60             | 53                      | 5         |
| Mo <sub>2</sub> C nanoribbon/N-G         | 0.5 M H <sub>2</sub> SO <sub>4</sub> | 10                           | 162            | 57                      | 6         |
| Mo <sub>2</sub> C@CC                     | 0.5 M H <sub>2</sub> SO <sub>4</sub> | 10                           | 106            | 54                      | 7         |
| Mo <sub>2</sub> C/G                      | 0.5 M H <sub>2</sub> SO <sub>4</sub> | 10                           | 166            | 80                      | 8         |
| 3DHP-Mo <sub>2</sub> C                   | 0.5 M H <sub>2</sub> SO <sub>4</sub> | 10                           | 166            | 75                      | 9         |
| np- $\eta$ -MoC NSs                      | 0.5 M H <sub>2</sub> SO <sub>4</sub> | 10                           | 122            | 53                      | 10        |
| vMo <sub>x</sub> C-Ar-O150-c             | 0.5 M H <sub>2</sub> SO <sub>4</sub> | 10                           | 130            | -                       | 11        |
| Mo <sub>2</sub> C@N-CANs                 | 0.5 M H <sub>2</sub> SO <sub>4</sub> | 10                           | 82             | 66                      | 12        |
| Mo <sub>2</sub> C/G                      | 0.5 M H <sub>2</sub> SO <sub>4</sub> | 10                           | 175            | 88                      | 8         |
| Mo <sub>2</sub> C@OCM                    | 0.5 M H <sub>2</sub> SO <sub>4</sub> | 10                           | 160            | 51                      | 1         |
| Mo <sub>2</sub> C/G3-NCS                 | 0.5 M H <sub>2</sub> SO <sub>4</sub> | 10                           | 70             | 39                      | 13        |
| Mo <sub>2</sub> C-graphene               | 0.5 M H <sub>2</sub> SO <sub>4</sub> | 10                           | 150            | 57                      | 14        |
| Mo <sub>2</sub> C/NCF                    | 0.5 M H <sub>2</sub> SO <sub>4</sub> | 10                           | 144            | 55                      | 2         |
| Mo <sub>2</sub> C@N-CNFs                 | 0.5 M H <sub>2</sub> SO <sub>4</sub> | 10                           | 167            | 70                      | 15        |
| Mo <sub>2</sub> C/GNRs                   | 0.5 M H <sub>2</sub> SO <sub>4</sub> | 10                           | 152            | 65                      | 16        |
| Mo <sub>2</sub> C@N-doped C              | 0.5 M H <sub>2</sub> SO <sub>4</sub> | 10                           | 124            | 60                      | 17        |
| Mo <sub>x</sub> C@3D N-doped C           | 0.5 M H <sub>2</sub> SO <sub>4</sub> | 10                           | 89             | 51                      | 18        |
| Mo <sub>2</sub> C/N-doped CNT            | 0.5 M H <sub>2</sub> SO <sub>4</sub> | 10                           | 147            | 71                      | 19        |
| Mo <sub>2</sub> C microparticles         | 0.5 M H <sub>2</sub> SO <sub>4</sub> | 20                           | ca. 225        | 55                      | 20        |
| MoC@graphite shell                       | 0.5 M H <sub>2</sub> SO <sub>4</sub> | 10                           | 124            | 43                      | 21        |
| MoC <sub>x</sub> octahedrons             | 0.5 M H <sub>2</sub> SO <sub>4</sub> | 10                           | 142            | 53                      | 22        |
| Mo <sub>2</sub> C nanowires              | 0.5 M H <sub>2</sub> SO <sub>4</sub> | 10                           | 130            | 53                      | 23        |
| Mo <sub>2</sub> C nanotubes              | 0.5 M H <sub>2</sub> SO <sub>4</sub> | 10                           | 172            | 34                      | 24        |
| MoCT <sub>x</sub> (Mxenes)               | 0.5 M H <sub>2</sub> SO <sub>4</sub> | 10                           | 283            | -                       | 25        |
| 3D hierarchical porous Mo <sub>2</sub> C | 0.5 M H <sub>2</sub> SO <sub>4</sub> | 10                           | 97             | 60                      | 26        |
| Mo <sub>x</sub> C-IOL                    | 0.5 M H <sub>2</sub> SO <sub>4</sub> | 10                           | 117            | 60                      | 27        |

**Table S4.** Comparison of HER performance for 3D Mo<sub>2</sub>C/PCM with other electrocatalysts in alkaline electrolytes.

| Catalysts                              | Electrolytes | $j$<br>(mA/cm <sup>2</sup> ) | $\eta$<br>(mV) | Tafel slope<br>(mV/dec) | Ref.      |
|----------------------------------------|--------------|------------------------------|----------------|-------------------------|-----------|
| 3D Mo <sub>2</sub> C/PCM               | 1.0 M KOH    | 10                           | 47             | 45                      | This work |
| Mo <sub>2</sub> C/CC                   | 1.0 M KOH    | 10                           | 140            | 124                     | 4         |
| Mo <sub>2</sub> C-MoO <sub>x</sub> /CC | 1.0 M KOH    | 10                           | 60             | 53                      | 5         |
| Mo <sub>x</sub> C/Cu                   | 1.0 M KOH    | 10                           | 136            | 98.3                    | 28        |
| Mo <sub>2</sub> C nanoribbon/N-G       | 1.0 M KOH    | 10                           | 162            | 57                      | 6         |
| Mo <sub>2</sub> C@CC                   | 1.0 M KOH    | 10                           | 72             | 52                      | 7         |
| Mo <sub>2</sub> C/G                    | 1.0 M KOH    | 10                           | 161            | 76                      | 8         |
| Mo <sub>2</sub> C/N-CNFs               | 1.0 M KOH    | 10                           | 168            | 47                      | 15        |
| np- $\eta$ -MoC NSs                    | 1.0 M KOH    | 10                           | 119            | 39                      | 10        |
| Mo <sub>2</sub> C/NCF                  | 1.0 M KOH    | 10                           | 100            | 65                      | 2         |
| Mo <sub>2</sub> C/GNRs                 | 1.0 M KOH    | 10                           | 121            | 54                      | 16        |
| Mo <sub>2</sub> C@N-doped C            | 1.0 M KOH    | 10                           | 78             | 41                      | 17        |
| Mo <sub>2</sub> C@3D N-doped C         | 1.0 M KOH    | 10                           | 122            | 78                      | 18        |
| 3DHP-Mo <sub>2</sub> C                 | 1.0 M KOH    | 10                           | 139            | 71                      | 9         |
| vMo <sub>x</sub> C-Ar-O150-c           | 1.0 M KOH    | 10                           | 116            | -                       | 11        |
| Mo <sub>2</sub> C@N-CANs               | 1.0 M KOH    | 10                           | 100            | 76                      | 12        |
| Mo <sub>2</sub> C@MCS                  | 1.0 M KOH    | 10                           | 134            | 51                      | 3         |
| Mo <sub>2</sub> C/G                    | 1.0 M KOH    | 10                           | 200            | 82                      | 8         |
| Mo <sub>2</sub> C@OCM                  | 1.0 M KOH    | 10                           | 175            | 64                      | 1         |
| Mo <sub>2</sub> C microparticles       | 1.0 M KOH    | 10                           | 210-240        | 5-59                    | 20        |
| Mo <sub>2</sub> C nanoparticles        | 1.0 M KOH    | 10                           | 176            | 58                      | 29        |
| MoC@graphite shell                     | 1.0 M KOH    | 10                           | 76             | 50                      | 21        |
| MoC <sub>x</sub> octahedrons           | 1.0 M KOH    | 10                           | 151            | 59                      | 22        |
| Mo <sub>2</sub> C nanotubes            | 0.1 M KOH    | 10                           | 117            | 55                      | 24        |
| Skeletal Mo <sub>x</sub> C             | 1.0 M KOH    | 10                           | 101            | 44                      | 30        |
| Mo <sub>x</sub> C-IOL                  | 0.1 M KOH    | 10                           | 82             | 56                      | 27        |

† The yellow area represents self-supporting Mo<sub>x</sub>C, the green area represents Mo<sub>x</sub>C-carbon, and the light blue area represents nanosized Mo<sub>x</sub>C.

## References

- 1 J. Wang, W. Wang, L. Ji, S. Czoska, L. Guo and Z. Chen, *ACS Appl. Energy Mater.*, 2018, **1**, 736–743.
- 2 Y. Huang, Q. Gong, X. Song, K. Feng, K. Nie, F. Zhao, Y. Wang, M. Zeng, J. Zhong and Y. Li, *ACS Nano*, 2016, **10**, 11337–11343.
- 3 S. Yuan, S. Xu, Z. Liu, G. Huang, C. Zhang, J. Ai, X. Li and N. Li, *ChemCatChem*, 2019, **11**, 2643–2648.
- 4 M. Fan, H. Chen, Y. Wu, L.-L. Feng, Y. Liu, G.-D. Li and X. Zou, *J. Mater. Chem. A*, 2015, **3**, 16320–16326.
- 5 L. He, W. Zhang, Q. Mo, W. Huang, L. Yang and Q. Gao, *Angew. Chemie Int. Ed.*, 2020, **59**, 3544–3548.
- 6 J. Gao, Z. Cheng, C. Shao, Y. Zhao, Z. Zhang and L. Qu, *J. Mater. Chem. A*, 2017, **5**, 12027–12033.
- 7 M. He, H. Shi, P. Wang, X. Sun and B. Gao, *Chem. – A Eur. J.*, 2019, **25**, 16106–16113.
- 8 H. Huang, C. Yu, H. Huang, W. Guo, M. Zhang, X. Han, Q. Wei, S. Cui, X. Tan and J. Qiu, *Small Methods*, 2019, **3**, 1900259.
- 9 T. Meng, L. Zheng, J. Qin, D. Zhao and M. Cao, *J. Mater. Chem. A*, 2017, **5**, 20228–20238.
- 10 C. Tang, H. Zhang, K. Xu, Q. Zhang, J. Liu, C. He, L. Fan and T. Asefa, *J. Mater. Chem. A*, 2019, **7**, 18030–18038.
- 11 S. Kim, C. Choi, J. Hwang, J. Park, J. Jeong, H. Jun, S. Lee, S.-K. Kim, J. H. Jang, Y. Jung and J. Lee, *ACS Nano*, 2020, **14**, 4988–4999.
- 12 Q. Kang, M. Li, Z. Wang, Q. Lu and F. Gao, *Nanoscale*, 2020, **12**, 5159–5169.
- 13 H. Wei, Q. Xi, X. Chen, D. Guo, F. Ding, Z. Yang, S. Wang, J. Li and S. Huang, *Adv. Sci.*, 2018, **5**, 1700733.
- 14 C. He and J. Tao, *Chem. Commun.*, 2015, **51**, 8323–8325.
- 15 Z.-Y. Wu, B.-C. Hu, P. Wu, H.-W. Liang, Z.-L. Yu, Y. Lin, Y.-R. Zheng, Z. Li and S.-H. Yu, *NPG Asia Mater.*, 2016, **8**, e288–e288.
- 16 X. Fan, Y. Liu, Z. Peng, Z. Zhang, H. Zhou, X. Zhang, B. I. Yakobson, W. A. Goddard, X. Guo, R. H. Hauge and J. M. Tour, *ACS Nano*, 2017, **11**, 384–394.
- 17 Y. Liu, G. Yu, G.-D. Li, Y. Sun, T. Asefa, W. Chen and X. Zou, *Angew. Chemie Int. Ed.*, 2015, **54**, 10752–10757.
- 18 H. Zhang, Z. Ma, G. Liu, L. Shi, J. Tang, H. Pang, K. Wu, T. Takei, J. Zhang, Y. Yamauchi and J. Ye, *NPG Asia Mater.*, 2016, **8**, e293–e293.
- 19 K. Zhang, Y. Zhao, D. Fu and Y. Chen, *J. Mater. Chem. A*, 2015, **3**, 5783–5788.
- 20 H. Vrubel and X. Hu, *Angew. Chemie Int. Ed.*, 2012, **51**, 12703–12706.
- 21 Z. Shi, Y. Wang, H. Lin, H. Zhang, M. Shen, S. Xie, Y. Zhang, Q. Gao and Y. Tang, *J. Mater. Chem. A*, 2016, **4**, 6006–6013.
- 22 H. Bin Wu, B. Y. Xia, L. Yu, X.-Y. Yu and X. W. (David) Lou, *Nat. Commun.*, 2015, **6**, 6512.
- 23 L. Liao, S. Wang, J. Xiao, X. Bian, Y. Zhang, M. D. Scanlon, X. Hu, Y. Tang, B. Liu and H. H. Girault, *Energy Environ. Sci.*, 2014, **7**, 387–392.
- 24 F.-X. Ma, H. Bin Wu, B. Y. Xia, C.-Y. Xu and X. W. (David) Lou, *Angew. Chemie Int. Ed.*, 2015, **54**, 15395–15399.
- 25 Z. W. Seh, K. D. Fredrickson, B. Anasori, J. Kibsgaard, A. L. Strickler, M. R. Lukatskaya, Y. Gogotsi, T. F. Jaramillo and A. Vojvodic, *ACS Energy Lett.*, 2016, **1**, 589–594.

- 26 H. Ang, H. Wang, B. Li, Y. Zong, X. Wang and Q. Yan, *Small*, 2016, **12**, 2859–2865.
- 27 F. Li, X. Zhao, J. Mahmood, M. S. Okyay, S.-M. Jung, I. Ahmad, S.-J. Kim, G.-F. Han, N. Park and J.-B. Baek, *ACS Nano*, 2017, **11**, 7527–7533.
- 28 Z. Wei, X. Hu, S. Ning, X. Kang and S. Chen, *ACS Sustain. Chem. Eng.*, 2019, **7**, 8458–8465.
- 29 L. Ma, L. R. L. Ting, V. Molinari, C. Giordano and B. S. Yeo, *J. Mater. Chem. A*, 2015, **3**, 8361–8368.
- 30 Y. Wang, Z. Shi, Q. Mo, B. Gao, B. Liu, L. Wang, Y. Zhang, Q. Gao and Y. Tang, *ChemElectroChem*, 2017, **4**, 2169–2177.
